# Supplementary material for: Clean G-SERF an NMR experiment for the complete eradication of axial peaks and undesired couplings from the complex spectrum
Source: Royal Society of Chemistry journal article supplement (doi:10.1039/c6ra25617a), 2017-01-01
Supplement: c6ra25617a1.pdf [file c6ra25617a1.pdf]

## Supporting Information

### Clean-G-SERF an NMR experiment for the Complete eradication of axial peaks and undesired couplings from the complex Spectrum

Sandeep Kumar Mishra, N. Lokesh and N. Suryaprakash

#### Index

|                                                                                                                                                          |     |
|----------------------------------------------------------------------------------------------------------------------------------------------------------|-----|
| 1. Table 1: Experimental Parameters                                                                                                                      | 2   |
| 2. Sensitivity of G-SERF vs Clean-G-SERF.                                                                                                                | 3   |
| 3. Table 2: Integral values of peaks of the coupled partners of selectively excited proton of strychnine molecule using G-SERF experiment                | 3   |
| 4. Table 3: Integral values of peaks of the coupled partners of selectively excited proton obtained of strychnine molecule using Clean-G-SERF experiment | 3   |
| 5. Pulse Programs                                                                                                                                        |     |
| a). Pulse program code for optimization of Constant Delay Delta ( $\Delta$ ) for Bruker NMR spectrometer                                                 | 4-5 |
| b). Pulse program code for Clean-G-SERF experiment for Bruker NMR spectrometer                                                                           | 6-8 |

## Experimental Parameters

**Table.1** Experimental parameters used for acquiring the G-SERF and Clean-G-SERF spectra of investigated molecules and molecular mixtures

| Molecule/<br>Molecular<br>mixtures<br>Figure<br>Number <sup>X</sup> | Experiment          | Selective<br>excitation<br>pulse/Duration<br>/ Excitation<br>Band width | Selective<br>Refocusing<br>pulse/Duration/<br>Excitation Band<br>width | Interscan<br>delay<br>(Sec) | Time<br>Domain<br>Points | Used<br>Gradient<br>strengths<br>(%) <sup>Y</sup> | Scans<br>NS/DS | Total<br>experimental<br>time |
|---------------------------------------------------------------------|---------------------|-------------------------------------------------------------------------|------------------------------------------------------------------------|-----------------------------|--------------------------|---------------------------------------------------|----------------|-------------------------------|
| 1                                                                   | <b>G-SERF</b>       | <i>EBurp/45ms/<br/>100.3Hz</i>                                          | Gaussian/10ms<br>/88.2Hz                                               | 3                           | 84                       | G2=0.8<br>G3=50<br>G4=40                          | 4/4            | 27 mins and<br>4 secs.        |
|                                                                     | <b>Clean-G-SERF</b> | <i>Identical</i>                                                        | Identical                                                              | 3                           | 84                       | G1=15<br>G2=0.8<br>G3=40<br>G4=50                 | 4/4            | 25 mins and<br>59 secs.       |
| 2                                                                   | <b>G-SERF</b>       | <i>EBurp/40ms/<br/>112.8Hz</i>                                          | Gaussian/8ms/<br>110.2Hz                                               | 3                           | 64                       | G2=0.8<br>G3=50<br>G4=40                          | 4/4            | 19 mins and<br>18 secs.       |
|                                                                     | <b>Clean-G-SERF</b> | <i>Identical</i>                                                        | Identical                                                              | 3                           | 64                       | G1=15<br>G2=0.8<br>G3=40<br>G4=50                 | 4/4            | 19 mins and<br>51 secs.       |
| 3                                                                   | <b>G-SERF</b>       | <i>EBurp/50 ms/<br/>90.3 Hz</i>                                         | Gaussian/10ms<br>/88.2Hz                                               | 3                           | 128                      | G2=0.8<br>G3=50<br>G4=40                          | 4/4            | 42 mins and<br>54 secs.       |
|                                                                     | <b>Clean-G-SERF</b> | <i>Identical</i>                                                        | Identical                                                              | 3                           | 64                       | G1=15<br>G2=0.8<br>G3=40<br>G4=50                 | 4/4            | 20 mins and<br>59 secs.       |
| 4                                                                   | <b>G-SERF</b>       | <i>EBurp/40ms/<br/>112.8Hz</i>                                          | Gaussian/8ms/<br>88.2Hz                                                | 3                           | 84                       | G2=0.8<br>G3=50<br>G4=40                          | 4/4            | 28 mins and<br>59 secs.       |
|                                                                     | <b>Clean-G-SERF</b> | <i>Identical</i>                                                        | Identical                                                              | 3                           | 84                       | G1=15<br>G2=0.8<br>G3=40<br>G4=50                 | 4/4            | 27 mins and<br>15 secs.       |

X= the molecule and the mixture of molecules corresponding to figure numbers given in the main manuscript, Y= The percentage of the gradients used in every experiment are of maximum available gradient strength that is 53.5 G/cm. The length of the gradients used for all the experiment was set for 1 milliseconds.

## Sensitivity of G-SERF vs Clean-G-SERF

To compare the sensitivity of the present experiment with G-SERF experiment we have carried out both the experiments with the identical common parameters and the obtained integral values from the G-SERF [pulse sequence used is reported in; N. Giraud, L. B<sub>1</sub>guin, J. Courtieu, D. Merlet, *Angew. Chem. Int. Ed.*, **2010**, *49*, 3481-3484; *Angew. Chem.* **2010**] and Clean-G-SERF are given in the Tables 1 and 2 respectively.

**Table 2.** Integral values of peaks of the coupled partners of selectively excited proton of strychnine molecule using G-SERF experiment [acquired with NS=8, DS=16 and 64 TD points in the indirect dimension]. One peak of the doublet is integrated and the integral 4 represent the integral value of noise region.

| Object     | Integral [abs] | Integral [rel] | Type   | Peaks | v(F2) [ppm] | v(F1) [ppm] |
|------------|----------------|----------------|--------|-------|-------------|-------------|
| Integral 1 | 11031000000.00 | 1.0000         | Manual | 0     | 1.4865      | -0.0143     |
| Integral 2 | 7547800000.00  | 0.6842         | Manual | 0     | 3.1692      | -0.0062     |
| Integral 3 | 7891200000.00  | 0.7154         | Manual | 0     | 3.9638      | -0.0052     |
| Integral 4 | 273850000.00   | 0.0248         | Manual | 0     | 3.4083      | -0.0277     |

**Table 3.** Integral values of peaks of the coupled partners of selectively excited proton obtained for strychnine molecule using Clean-G-SERF experiment [acquired with NS=8, DS=16 and 64 TD points in the indirect dimension]. One peak of the doublet is integrated and the integral 4 represent the integral value of noise region.

| Object     | Integral [abs] | Integral [rel] | Type   | Peaks | v(F2) [ppm] | v(F1) [ppm] |
|------------|----------------|----------------|--------|-------|-------------|-------------|
| Integral 1 | 19065000000.00 | 1.0000         | Manual | 0     | 1.4877      | -0.0144     |
| Integral 2 | 12031000000.00 | 0.6311         | Manual | 0     | 3.1646      | -0.0056     |
| Integral 3 | 10525000000.00 | 0.5521         | Manual | 0     | 3.9569      | -0.0054     |
| Integral 4 | 540690000.00   | 0.0348         | Manual | 0     | 3.5077      | 2.7543      |

## Pulse Programs

### Pulse program code for optimization of constant delay $\Delta$ in Bruker NMR spectrometer

```
#include <Avance.incl>
#include <Grad.incl>
#include <Delay.incl>

# ifdef CALC_SPOFFS
"spoff1=bf1*(cnst21/1000000)-o1"
# else
# endif /*CALC_SPOFFS*/

"in0=inf1/2"
"p2=p1*2"
"d0=3u"

1 ze
2 30m
  d1
  4u pl0:f1
  p11:sp1:f1 ph1:r
  4u
  d14 pl1:f1
  50u UNBLKGRAD
  p16:gp1
  d16
  p0 ph2
  d13
  p16:gp1
  d16
  4u BLKGRAD
  go=2 ph31
  30m mc #0 to 2 F0(zd)
exit

ph1=0 2
ph2=0 0 2 2
ph31=0 2

;p10 : 0W
;p11 : f1 channel - power level for pulse (default)
;sp1: f1 channel - shaped pulse
;p1 : f1 channel - 90 degree high power pulse
```

```

;p11: f1 channel - 90 degree shaped pulse
;d1 : relaxation delay; 1-5 * T1
;d14: delay for evolution after shaped pulse:
;for 90 deg pulse      (p11)/2 + d14 ~ 1/(2J)
;cnst21: chemical shift for selective pulse (offset, in ppm)
;ns: 2 * n, total number of scans: NS * TDO
;ds: 2
;use gradient ratio:  gp 1
;          15
;for z-only gradients:
;gpz1: 15%
;use gradient files:
(topspin 2.1)
;gpnam1: SINE.100
;gpnam3: SINE.100
;gpnam4: SINE.100

(Topspin3.x)
;gpnam1: SMSQ10.100
;gpnam1: SMSQ10.100
;gpnam1: SMSQ10.100

;phcor 1 : phase difference between power levels sp1 and pl1

;choose p11 according to desired selectivity
;the flip-angle is determined by the amplitude
;set O1 on resonance on the multiplet to be excited or use spoffs

```

## Clean-G-SERF pulse program code for Bruker spectrometer

```
;pp: Clean-G-SERF  
;class: 2D  
;Topspin2.1 & Topspin3.x
```

```
#include <Avance.incl>  
#include <Grad.incl>  
#include <Delay.incl>
```

```
"d13=4u"  
"d4=1s/(cnst2*2)"  
"in0=inf1/2"  
"d0=3u"
```

```
1 ze  
2 d1 p10:f1  
3 (p11:sp1 ph1) ; 90 (selective)  
d4  
50u UNBLKGRAD  
p16:gp1  
d16 p11:f1  
p1 ph2  
p16:gp1  
d16  
p16:gp3  
d16  
200u gron2 ; slice selective gradient on  
(p12:sp2 ph2):f1 ; 180 (selective)  
100u groff ;slice selective gradient off  
100u  
p16:gp3  
d16  
d0  
p16:gp4  
d16  
(p12:sp2 ph2):f1 ; 180 (selective)  
  
200u gron2 ; slice selective gradient on  
(p12:sp2 ph2):f1 ; 180 (selective)  
100u groff ;slice selective gradient off
```

```

100u
d16
d0
(p12:sp2 ph2):f1          ; 180 (selective)
p16:gp4
4u BLKGRAD
go=2 ph31
d1 mc #0 to 2 F1QF(id0)
exit

```

```

ph1=0 2
ph2=0 0 2 2
ph31=0 2

```

```

;p11 : f1 channel - power level for pulse (default)
;p0 : f1 channel - 20 to 90 degree high power pulse
;p1 : f1 channel - 90 degree high power pulse
;p11: 90 degree shape pulse
;p12: 180 degree shape pulse
;sp1: 90 degree shape pulse power label
;sp2: 180 degree shape pulse power label
;p16: homospoil/gradient pulse
;d0 : incremented delay (2D)          [3 usec]
;d1 : relaxation delay; 1-5 * T1
;d13: short delay                    [4 usec]
;d16: delay for homospoil/gradient recovery
;inf1: 1/SW = 2 * DW
;in0: 1/(1 * SW) = 2 * DW
;nd0: 1
;NS: 2 * n
;DS: 16
;td1: number of experiments
;FnMODE: QF
;use gradient ratio:  gp 1
;          10-15
;for z-only gradients:
;gpz1: 10-15%
;use gradient files:
(topspin 2.1)
;gpnam1: SINE.100
;gpnam3: SINE.100
;gpnam4: SINE.100

```

(Topspin3.x)

;gpnam1: SMSQ10.100

;gpnam1: SMSQ10.100

;gpnam1: SMSQ10.100
